# Supplementary material for: Copper-Induced Interactions of Caffeic Acid and Sinapic Acid to Generate New Compounds in Artificial Biological Fluid Conditions
Source: MDPI journal article supplement (doi:10.3390/antiox11071307), 2022-06-30

Figure S1: Chromatograms of standard HCAs, (A) their chemical structures, and (B) their UV spectra showing particular wavelengths. Described numbers in spectra are  $\lambda_{\max}$  of the wavelengths. The analytes were separated on a Sunshell C18 column (2.6  $\mu\text{m}$ , 2.1  $\times$  150 mm; ChromaNik Tech., Japan). The column oven temperature was maintained at 40  $^{\circ}\text{C}$ . The mobile phase was 0.1 % aqueous formic acid (A) and 0.1 % formic acid in acetonitrile (B). The gradient elution program was as follows: 0–15 min, 10–30 % B; 15–15.1 min, 30–90 % B; 15.1–19 min, 90 % B; and 19–19.1 min, 90–10 % B; followed by the re-equilibration of the initial solvent composition for 10.9 min (19.1–30 min). The flow rate was kept constant at 0.3 mL/min.

(A)

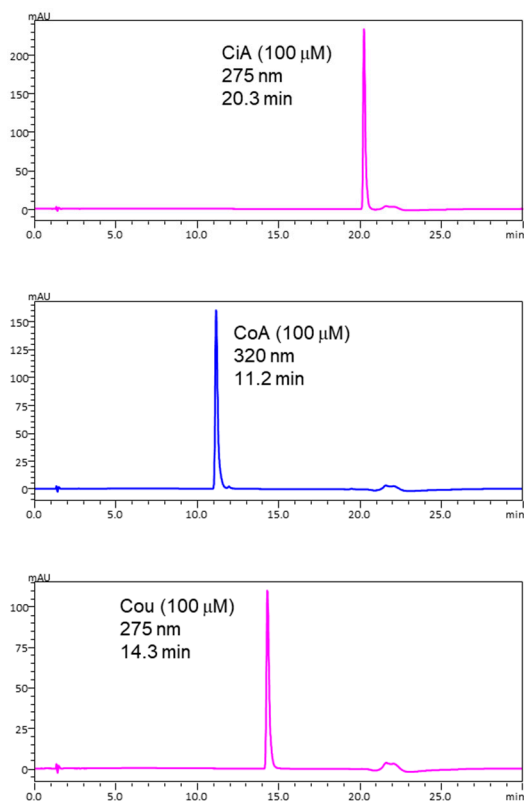

(B)

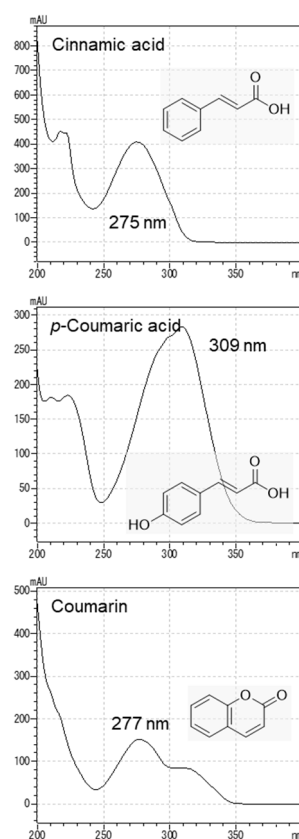

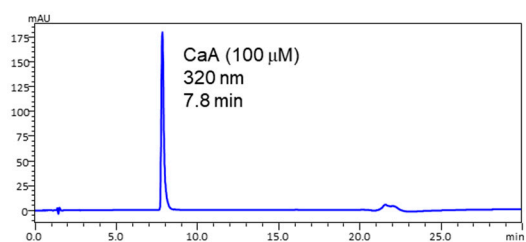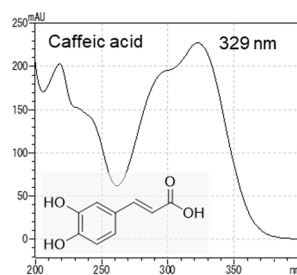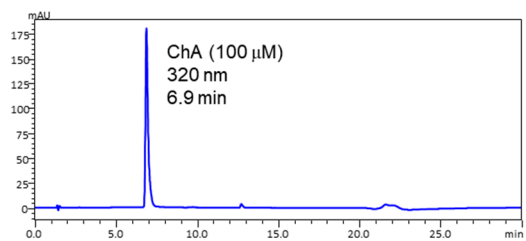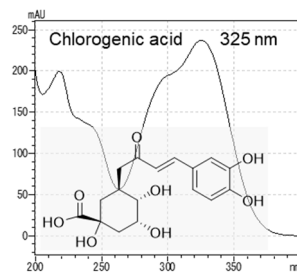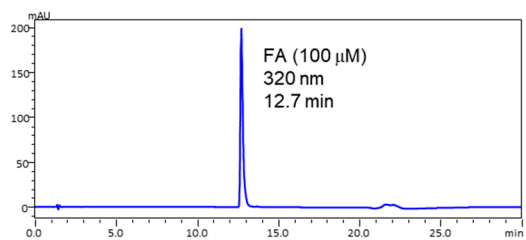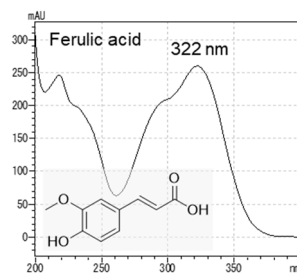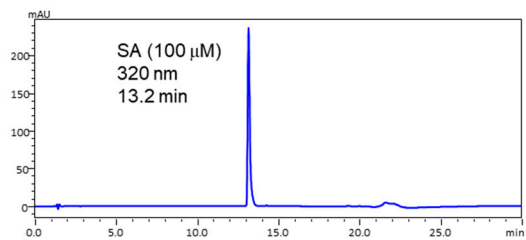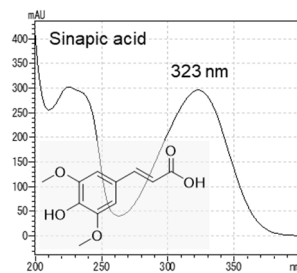

Figure S2: Inhibition of HCA derivatization using antioxidants or chelators.

(A) CaA with copper ion in FaSSIF at 37 °C

(B) SA with copper ion in FaSSIF at 37 °C

(A)

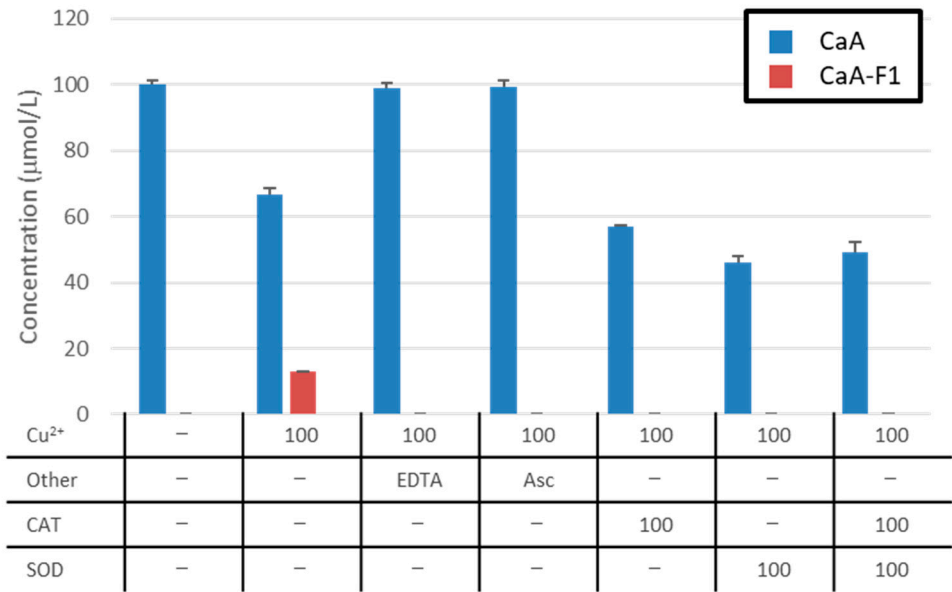

(B)

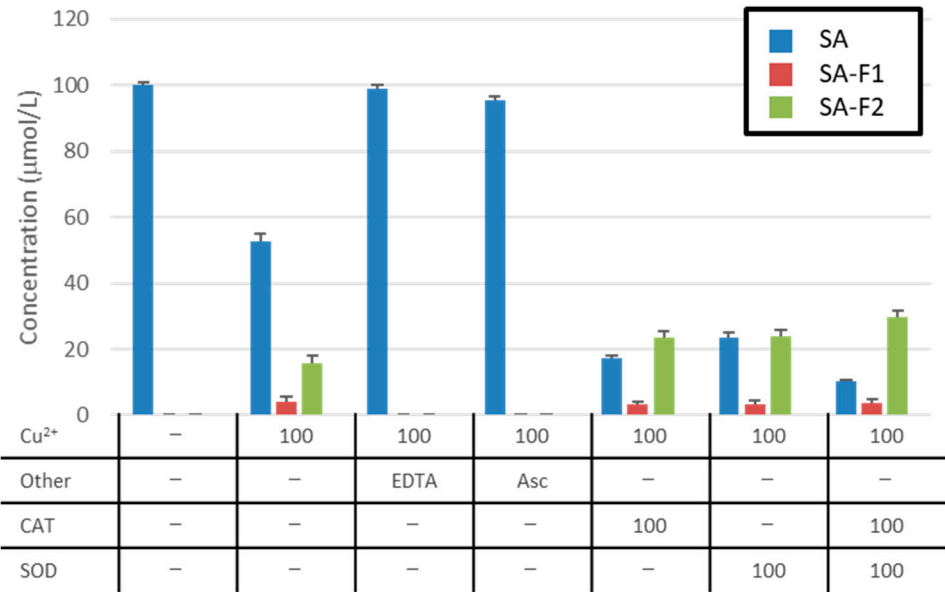

Supplement: s1 [file s1]
